# Supplementary material for: Photochemical deposition of amorphous MoSx on one-dimensional NaNbO3–CdS heterojunction photocatalysts for highly efficient visible-light-driven hydrogen evolution
Source: Royal Society of Chemistry journal article supplement (doi:10.1039/d0dt01290d), 2020-01-01
Supplement: d0dt01290d1.pdf [file d0dt01290d1.pdf]

## Supporting information

### Photochemical deposition of amorphous MoS<sub>x</sub> on one-dimensional NaNbO<sub>3</sub>-CdS heterojunction photocatalyst for highly efficient visible-light-driven hydrogen evolution

Jiawei Zhu<sup>a</sup>, Jingjing Xu<sup>a, b \*</sup>, Xiaoyu Du, QiuHong Li, Yihang Fu, Mindong Chen<sup>a</sup>

<sup>a</sup> Jiangsu Key Laboratory of Atmospheric Environment Monitoring and Pollution Control, School of Environmental Science and Engineering, Collaborative Innovation Center of Atmospheric Environment and Equipment Technology, Jiangsu Engineering Technology Research Center of Environmental Cleaning Materials, Nanjing University of Information Science and Technology, Nanjing, 210044, China

<sup>b</sup> Key Laboratory of Jiangxi Province for Persistent Pollutants Control and Resources Recycle, Nanchang Hangkong University, Nanchang 330063, PR China

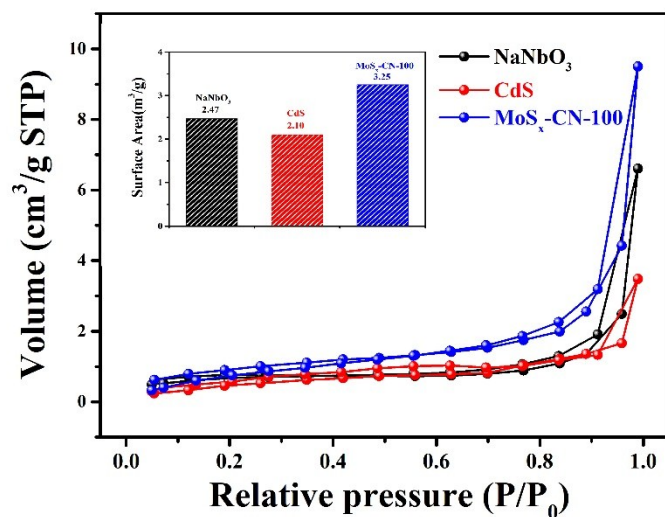

Fig. S1 Nitrogen adsorption–desorption isotherms of NaNbO<sub>3</sub>, CdS and MoS<sub>x</sub>-CN-100. Inset: The BET surface area of NaNbO<sub>3</sub>, CdS and MoS<sub>x</sub>-CN-100.

\* Corresponding author. Tel./fax: +86 25 58731090

E-mail address: [xujj@seu.edu.cn](mailto:xujj@seu.edu.cn), [xujj@nuist.edu.cn](mailto:xujj@nuist.edu.cn) (JingJing Xu)

Table S1. A comparison of the hydrogen evolution performance between our MoS<sub>x</sub>-CN and CdS, NaNbO<sub>3</sub> based photocatalysts

| No. | photocatalysts                                       | Light source<br>(Wavelength)              | Sacrificial<br>solution                            | H <sub>2</sub><br>mmol/h/g | Ref.      |
|-----|------------------------------------------------------|-------------------------------------------|----------------------------------------------------|----------------------------|-----------|
| 1   | MoS <sub>x</sub> -NaNbO <sub>3</sub> -CdS            | Xe lamp 300W(>400 nm)                     | Lactic acid                                        | 2.386                      | This work |
| 2   | CdS/Ni-MOF                                           | Xe lamp 300W (>420nm)                     | Lactic acid                                        | 2.508                      | 1         |
| 3   | CdS/Zn <sub>2</sub> GeO <sub>4</sub>                 | Xe lamp 300W (>420nm)                     | Na <sub>2</sub> SO <sub>3</sub> &Na <sub>2</sub> S | 1.72                       | 2         |
| 4   | CdS/MoS <sub>2</sub>                                 | Xe lamp 300W (>420nm)                     | Lactic acid                                        | 1.4                        | 3         |
| 5   | g-C <sub>3</sub> N <sub>4</sub> /Au/CdS              | Xe lamp 300W (>420nm)                     | Lactic acid                                        | 1.1                        | 4         |
| 6   | Pt-rGO-NaNbO <sub>3</sub>                            | Xe lamp 300W (>420nm)                     | Methanol                                           | 2.342                      | 5         |
| 7   | Pt-NaNbO <sub>3</sub>                                | Xe lamp 300W                              | Methanol                                           | 0.266                      | 6         |
| 8   | Ca-NaNbO <sub>3</sub> -C <sub>3</sub> N <sub>4</sub> | Solar irradiation (~900W/m <sup>2</sup> ) | Methanol                                           | 2.95                       | 7         |
| 9   | NaNbO <sub>3</sub> -Pt                               | Xe lamp 400W (>300nm)                     | Lactic acid                                        | 1.12                       | 8         |

## Reference

- [1] Guo J., Liang, Y., Liu, L., Hu, J., Wang, H., An, W., Cui, W., Noble-metal-free CdS/Ni-MOF composites with highly efficient charge separation for photocatalytic H<sub>2</sub> evolution, *Applied Surface Science*. 2020. 146356.
- [2] Hou Z., Zou, X., Song, X., Pu, X., Geng, Y., Wang, L., Fabrication of CdS/Zn<sub>2</sub>GeO<sub>4</sub> heterojunction with enhanced visible-light photocatalytic H<sub>2</sub> evolution activity, *International Journal of Hydrogen Energy*. 2019, 44(54), 28649-28655.
- [3] Liu Y., Niu, H., Gu, W., Cai, X., Mao, B., Li, D., Shi, W., In-situ construction of hierarchical CdS/MoS<sub>2</sub> microboxes for enhanced visible-light photocatalytic H<sub>2</sub> production, *Chemical Engineering Journal*. 2018, 339, 117-124.
- [4] Li W., Feng, C., Dai, S., Yue, J., Hua, F., Hou, H., Fabrication of sulfur-doped g-C<sub>3</sub>N<sub>4</sub>/Au/CdS Z-scheme photocatalyst to improve the photocatalytic performance under visible light, *Applied Catalysis B: Environmental*. 2015, 168-169, 465-471.
- [5] Yang F., Zhang, Q., Zhang, L., Cao, M., Liu, Q., Dai, W.-L., Facile synthesis of highly efficient Pt/N-rGO/N-NaNbO<sub>3</sub> nanorods toward photocatalytic hydrogen production, *Applied Catalysis B: Environmental*. 2019, 257, 117901.
- [6] Liu Q., Chai, Y., Zhang, L., Ren, J., Dai, W.-L., Highly efficient Pt/NaNbO<sub>3</sub> nanowire

photocatalyst: Its morphology effect and application in water purification and H<sub>2</sub> production, *Applied Catalysis B: Environmental*. 2017, 205, 505-513.

[7] Singh Vig A., Rani, N., Gupta, A., Pandey, O. P., Influence of Ca-doped NaNbO<sub>3</sub> and its heterojunction with g-C<sub>3</sub>N<sub>4</sub> on the photoredox performance, *Solar Energy*. 2019, 185, 469-479.

[8] Zhang D., Cheng, J., Shi, F., Cheng, Z., Yang, X., Cao, M., Low-temperature synthesis of ribbon-like orthorhombic NaNbO<sub>3</sub> fibers and their photocatalytic activities for H<sub>2</sub> evolution, *RSC Advances*. 2015, 5(42), 33001-33007.
